# Supplementary material for: Stability of Phenolic Compounds, Antioxidant Activity and Color Parameters in Colored-Flesh Potato Chips
Source: MDPI journal article supplement (doi:10.3390/molecules28166047), 2023-08-14
Supplement: s1 [file s1]

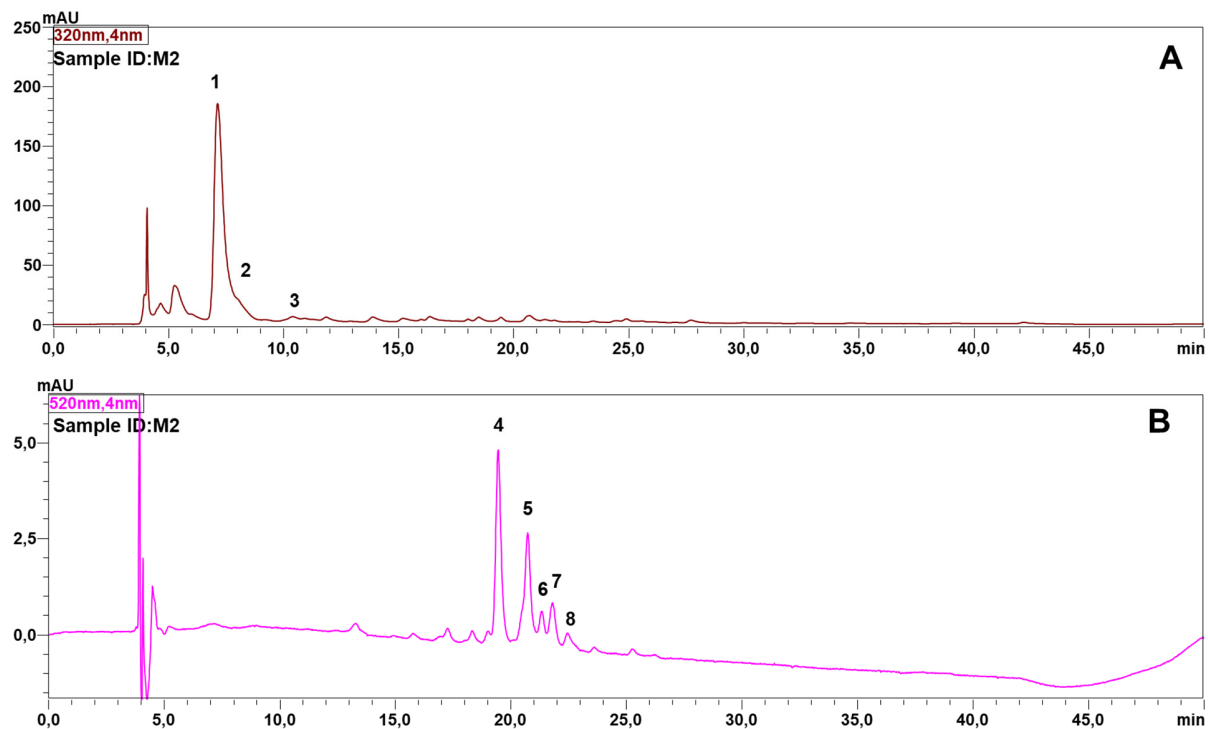

**Figure S1:** HPLC-DAD chromatogram of phenolic compound in *Solanum tuberosum* chips. Where A) hydroxycinnamic acids at 320 nm and B) anthocyanins at 520 nm

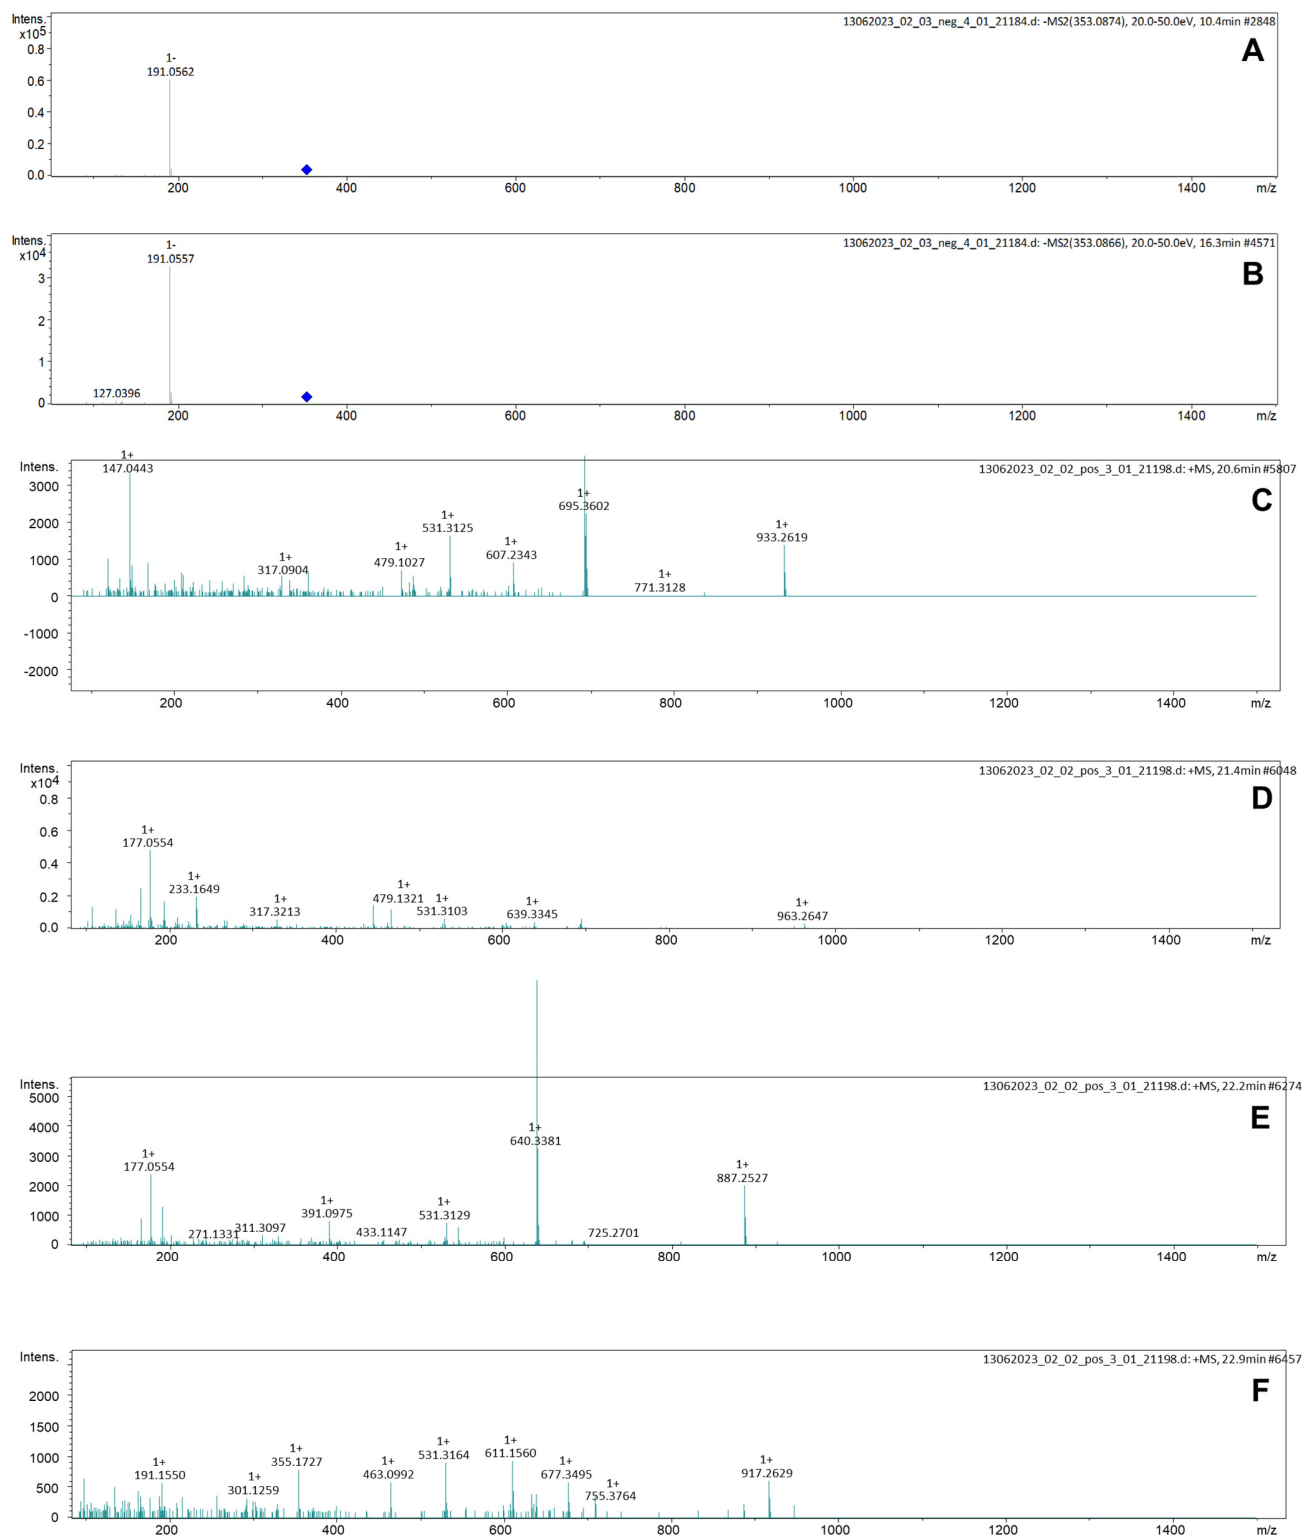

**Figure S2:** Mass spectrometry (MS/MS) spectra under negative ionization (A,B) by hydroxycinnamic acids and under positive ionization (C-F) by anthocyanins in *Solanum tuberosum* chips. Where A) peak 1, 5-caffeoylquinic acid; B) peak 3, caffeoylquinic acid

isomer; C) peak 4, petunidin-3-p-coumaroylrutinoside-5-glucoside; D) peak 5, petunidin-3-feruloylrutinoside-5-glucoside; E) peak 6, pelargonidin-3-p-coumaroylrutinoside-5-glucoside; and F) peak 7, peonidin-3-p-coumaroylrutinoside-5-glucoside.
